# Supplementary material for: Natural isoflavone formononetin inhibits IgE-mediated mast cell activation and allergic inflammation by increasing IgE receptor degradation
Source: Royal Society of Chemistry journal article supplement (doi:10.1039/d2fo03997d), 2023-01-01
Supplement: d2fo03997d5.pdf [file d2fo03997d5.pdf]

**Table S1.** Sequences of primers used in real-time RT-qPCR.

| Gene                                 | Forward (5' to 3')           | Reverse (5' to 3')      |
|--------------------------------------|------------------------------|-------------------------|
| <i>Rat GAPDH</i>                     | GGCACAGTCAAGGCTGAGAATG       | ATGGTGGTGAAGACGCCAGTA   |
| <i>Rat IL-13</i>                     | AGCAACATCACACAAGACC          | GGTTACAGAGGCCATTCA      |
| <i>Rat TNF</i>                       | CCCTGTTCTGCTTTCTCA           | GTTCTCCGTGGTGTTCCT      |
| <i>Rat IL-4</i>                      | GAGGACCAGAACGAGACA           | CCAGAAGCGTGACAGAGA      |
| <i>Rat Fc<math>\epsilon</math>1A</i> | GGCTGCTGCTCCAATCTTC          | GCAATGTCGTCCTTGTAGTAGA  |
| <i>Rat Ms4a2</i>                     | TGCTCCACACTCCAGACTTC         | GCTGCCTCTCACCAGATACA    |
| <i>Rat Fc<math>\epsilon</math>1G</i> | GGTGATCTTGTTCTTGCTCCTT       | TCACGGCTGGCTATGTCTG     |
| <i>Mouse GAPDH</i>                   | AAGAAGGTGGTGAAGCAGG          | GAAGGTGGAAGAGTGGGAGT    |
| <i>Mouse TNF</i>                     | CGTGGAAGTGGCAGAAGAG          | GTAGACAGAAGAGCGTGGTG    |
| <i>Mouse IL-13</i>                   | CTCTTGCTTGCCCTGGTGGTC        | AGGGGAGTCTGGTCTTGTGTGAT |
| <i>Mouse IL-1<math>\beta</math></i>  | TGTGTTTTTCCTCCTTGCTCTGA<br>T | TGCTGCCTAATGTCCCCTTGAAT |
