# Supplementary material for: Natural isoflavone formononetin inhibits IgE-mediated mast cell activation and allergic inflammation by increasing IgE receptor degradation
Source: Royal Society of Chemistry journal article supplement (doi:10.1039/d2fo03997d), 2023-01-01
Supplement: d2fo03997d6.pdf [file d2fo03997d6.pdf]

# Western blotting images

**Figure 3A**

*From left to right:*

*Control group, DNP group, DNP+FNT20 $\mu$ M group, and DNP+FNT40 $\mu$ M group.*

| p38 (triplicate)                                                                    | p-p38 (triplicate)                                                                   |
|-------------------------------------------------------------------------------------|--------------------------------------------------------------------------------------|
| 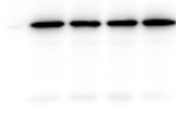   |    |
|    |    |
|   |   |
| ERK1/2 (triplicate)                                                                 | p-ERK1/2 (triplicate)                                                                |
|  |  |
|  |  |
|  |  |
| JNK (triplicate)                                                                    | p-JNK (triplicate)                                                                   |

|                                                                                     |                                                                                    |
|-------------------------------------------------------------------------------------|------------------------------------------------------------------------------------|
| 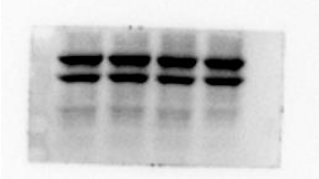   |  |
|    |  |
|    |  |
| <b>GAPDH (triplicate)</b>                                                           |                                                                                    |
|   |                                                                                    |
|  |                                                                                    |
|  |                                                                                    |

**Figure 3B**

*From left to right:*

*Control group, DNP group, DNP+FNT20μM group, and DNP+FNT40μM group.*

|                         |                           |
|-------------------------|---------------------------|
| <b>P65 (triplicate)</b> | <b>p-p65 (triplicate)</b> |
|-------------------------|---------------------------|

|                                                                                     |                                                                                      |
|-------------------------------------------------------------------------------------|--------------------------------------------------------------------------------------|
| 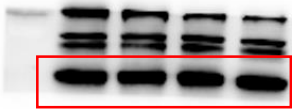   |    |
|    |    |
|    |    |
| <b>IKBα(triplicate)</b>                                                             | <b>p- IKBα(triplicate)</b>                                                           |
|    |    |
|  |  |
|  |  |
| <b>GAPDH</b>                                                                        | <b>GAPDH</b>                                                                         |
|  |  |
|  |                                                                                      |

**Figure 4D**

*From left to right:*

*Control group, DNP group, DNP+FNT20μM group, and DNP+FNT40μM group.*

| FcεRIα(triplicate)                                                                  | FcεRIβ(triplicate)                                                                   |
|-------------------------------------------------------------------------------------|--------------------------------------------------------------------------------------|
| 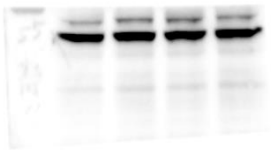   |    |
|   |   |
|  |  |
| FcεRIγ(triplicate)                                                                  | GAPDH (triplicate)                                                                   |
|  |  |
|  |  |

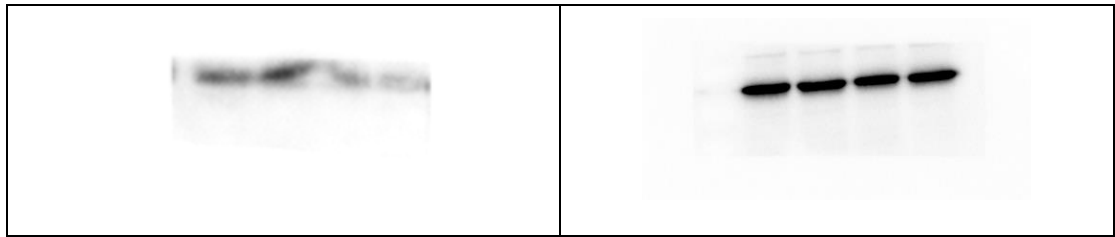

**Figure 4F**

*From left to right: Control group, FNT20 $\mu$ M group, and FNT40 $\mu$ M group.*

| Flag (triplicate)                                                                   | ZsGreen1 (triplicate)                                                                |
|-------------------------------------------------------------------------------------|--------------------------------------------------------------------------------------|
| 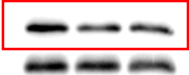   |    |
|  |  |
|  |  |
| GAPDH (triplicate)                                                                  |                                                                                      |
|  |                                                                                      |

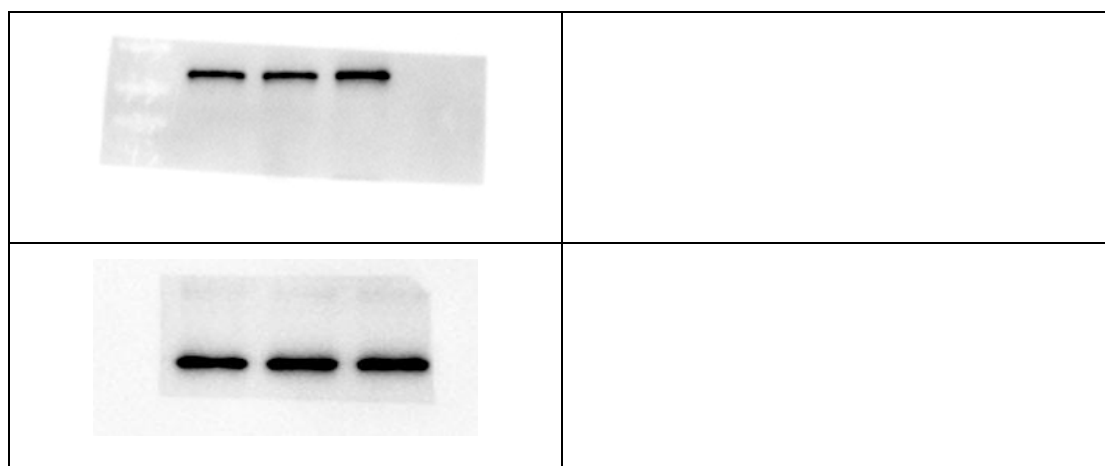

**Figure 4G**

*From left to right:*

*Control group, CHX pretreatment (200μM) for 1, 2, and 4 h without and with FNT treatment.*

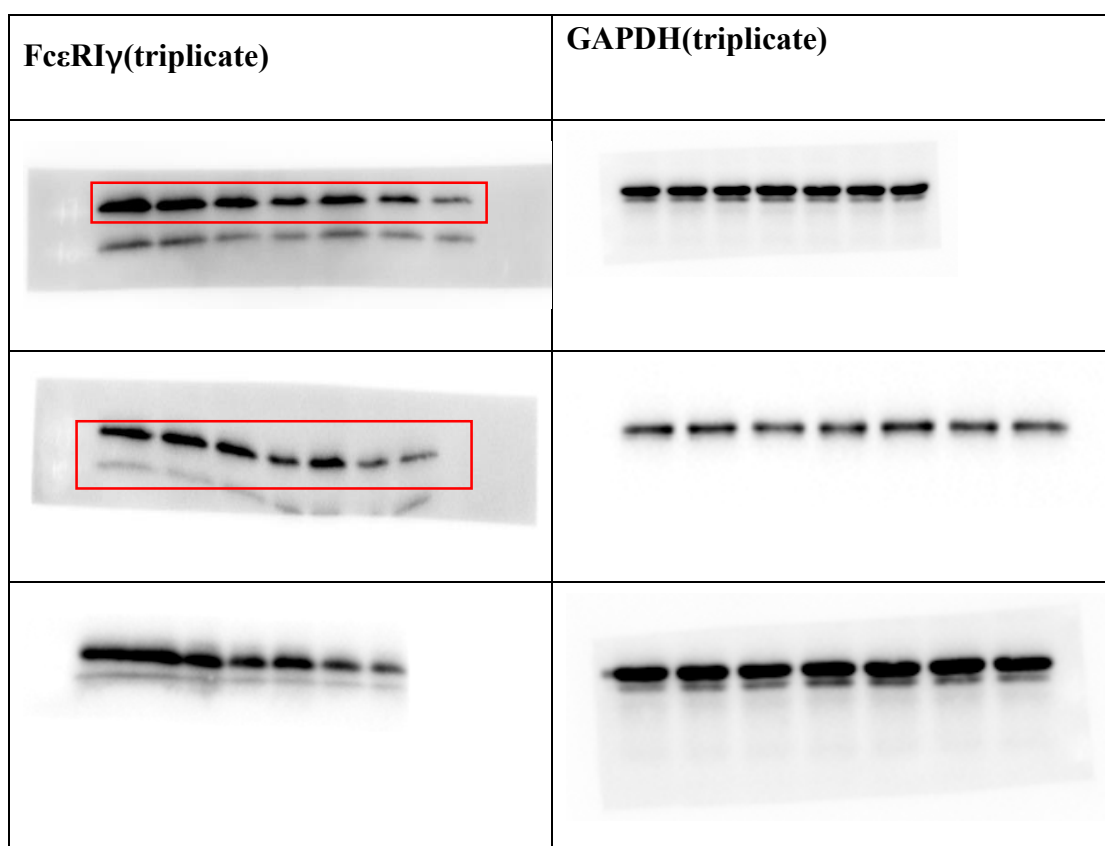

**Figure 4H**

*From left to right:*

*Control group, FNT20μM group, MG132 group, and MG132 +FNT20μM group.*

| FcεRIγ(triplicate)                                                                 | GAPDH(triplicate)                                                                   |
|------------------------------------------------------------------------------------|-------------------------------------------------------------------------------------|
|   |   |
|   |   |
|  |  |

**Figure 4E, Figure 5A**

*RBL-2H3 IP:FcεRIγ*

*From left to right:Control group, DNP group, DNP+FNT20μM group, and DNP+FNT40μM group.*

| IP:FcεRIα(triplicate)                                                               | IP:FcεRIβ(triplicate)                                                                |
|-------------------------------------------------------------------------------------|--------------------------------------------------------------------------------------|
| 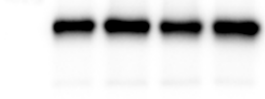 |  |

|                                                                                     |                                                                                       |
|-------------------------------------------------------------------------------------|---------------------------------------------------------------------------------------|
| 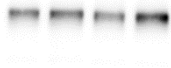   |     |
|    |     |
| <b>IP:FcεRIγ(triplicate)</b>                                                        | <b>Input: FcεRIγ(triplicate)</b>                                                      |
|    |     |
|   |   |
|  |   |
| <b>IP:Ub(triplicate)</b>                                                            | <b>GAPDH (triplicate)</b>                                                             |
|  |  |



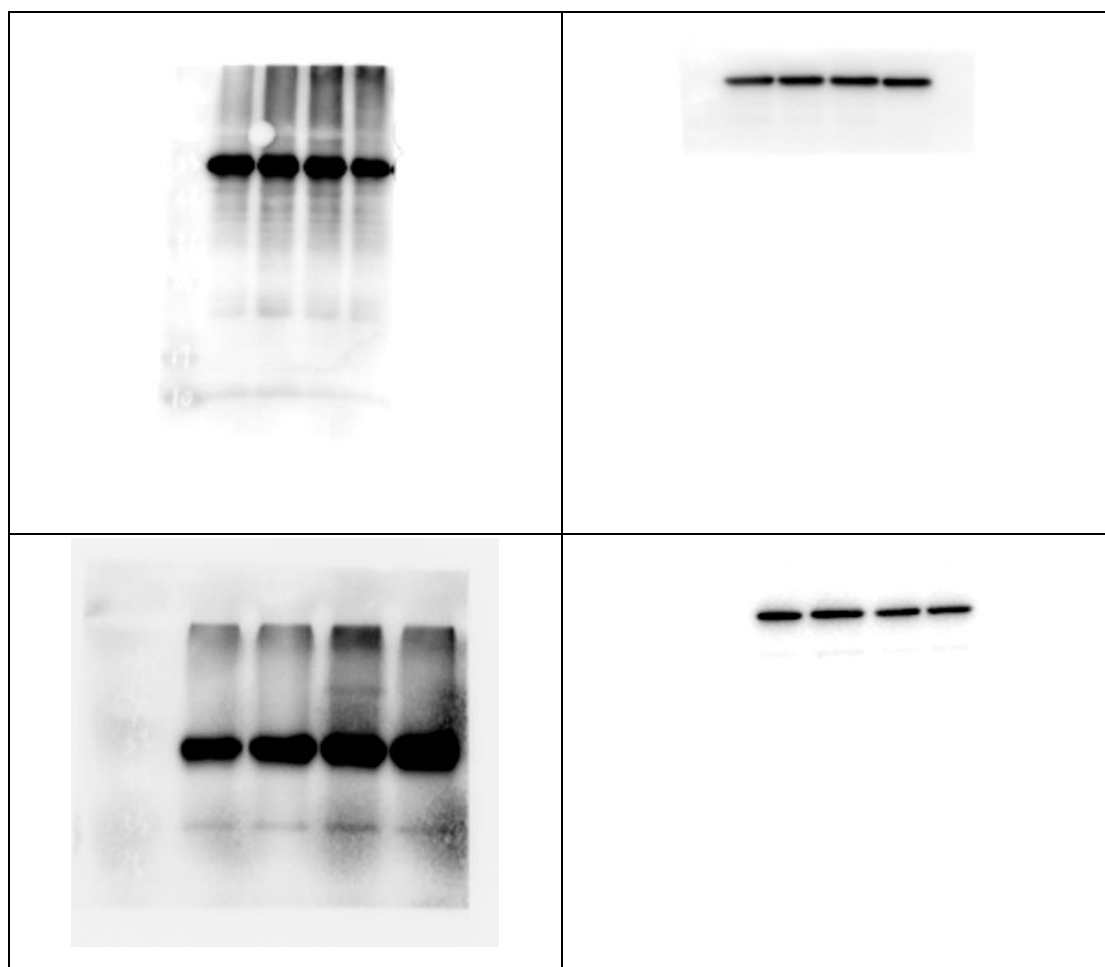

**Figure 5B**

*293T cells transfected with FcεRIγ-Flag and myc-ubiquitin (Ub) plasmids.*

*IP:FcεRIγ*

*From left to right:Control group, FcεRIγ-Flag and myc-ubiquitin (Ub), FcεRIγ-Flag and myc-ubiquitin (Ub)+FNT20μM group, and FcεRIγ-Flag and myc-ubiquitin (Ub)+FNT40μM group.*

| IP:Myc(triplicate) | IP:Flag(triplicate) |
|--------------------|---------------------|
|--------------------|---------------------|

|                                                                                     |                                                                                      |
|-------------------------------------------------------------------------------------|--------------------------------------------------------------------------------------|
| 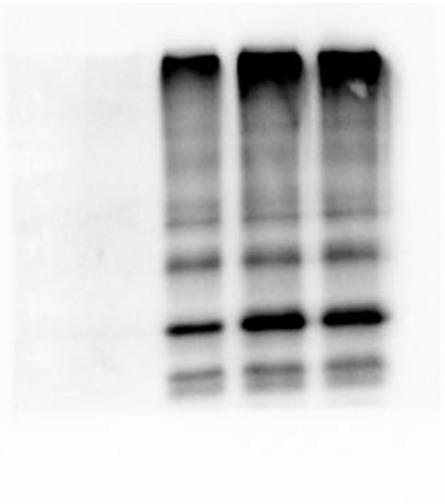   |    |
|   |   |
|  |  |
| <p><b>Input:Flag(triplicate)</b></p>                                                | <p><b>Input: GAPDH (triplicate)</b></p>                                              |

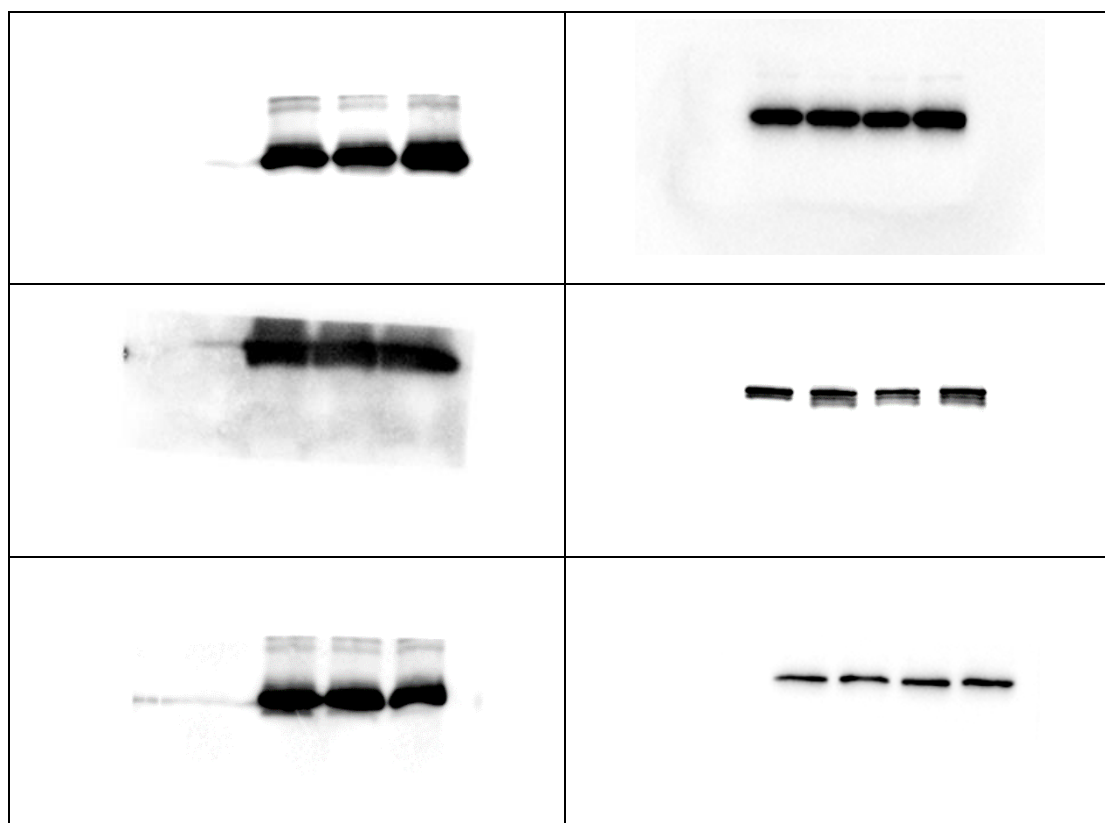

**Figure 5C**

*From left to right:*

*Control group, DNP group, DNP+FNT20 $\mu$ M group, and DNP+FNT40 $\mu$ M group.*

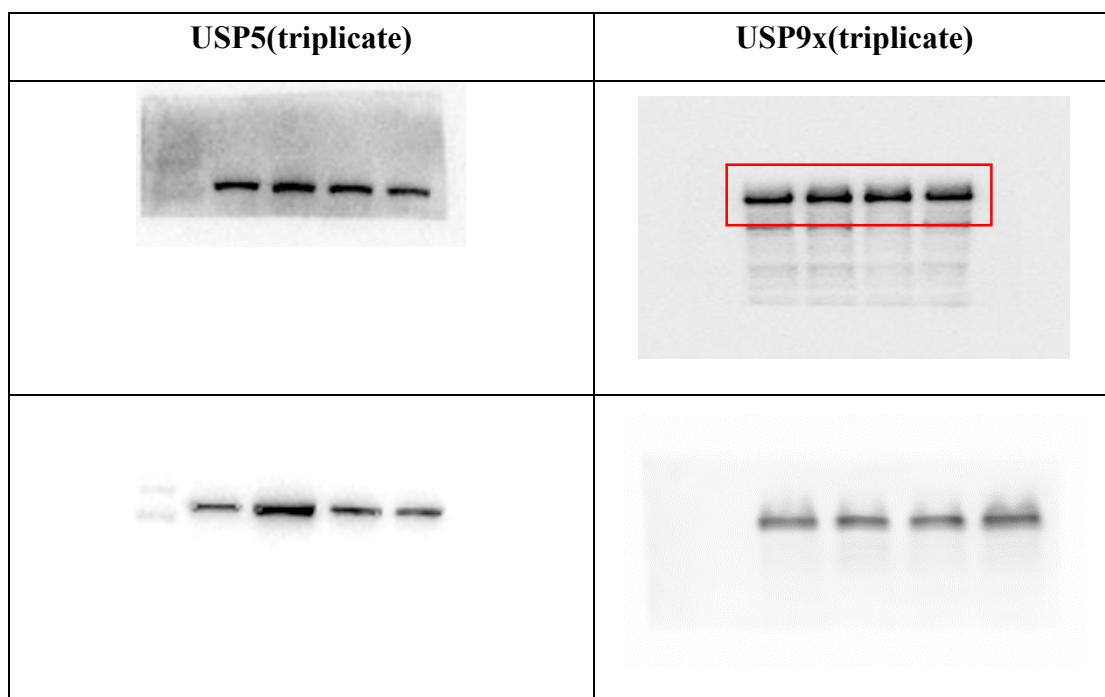

|                                                                                     |                                                                                      |
|-------------------------------------------------------------------------------------|--------------------------------------------------------------------------------------|
| 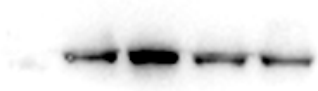   |    |
| <b>USP10(triplicate)</b>                                                            | <b>USP13(triplicate)</b>                                                             |
|    |    |
|   |  |
|  |  |
| <b>GAPDH (triplicate)</b>                                                           |                                                                                      |
|  |                                                                                      |
|  |                                                                                      |

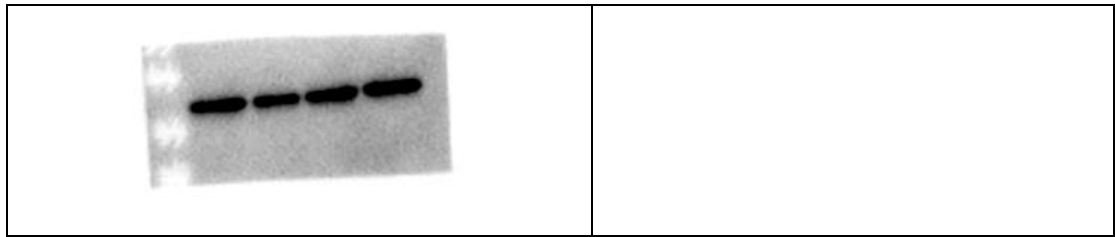

**Figure 5D**

*RBL-2H3 IP:FcεRIγ*

*From left to right: Control group, DNP group, DNP+FNT20μM group, and DNP+FNT40μM group.*

| IP: USP5                                                                            | IP: USP13                                                                            |
|-------------------------------------------------------------------------------------|--------------------------------------------------------------------------------------|
| 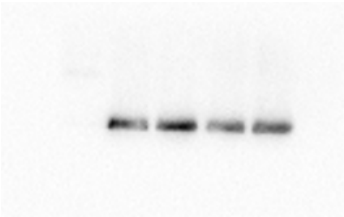  |   |
|  |  |
|  |  |
| Input: FcεRIγ                                                                       | GAPDH                                                                                |

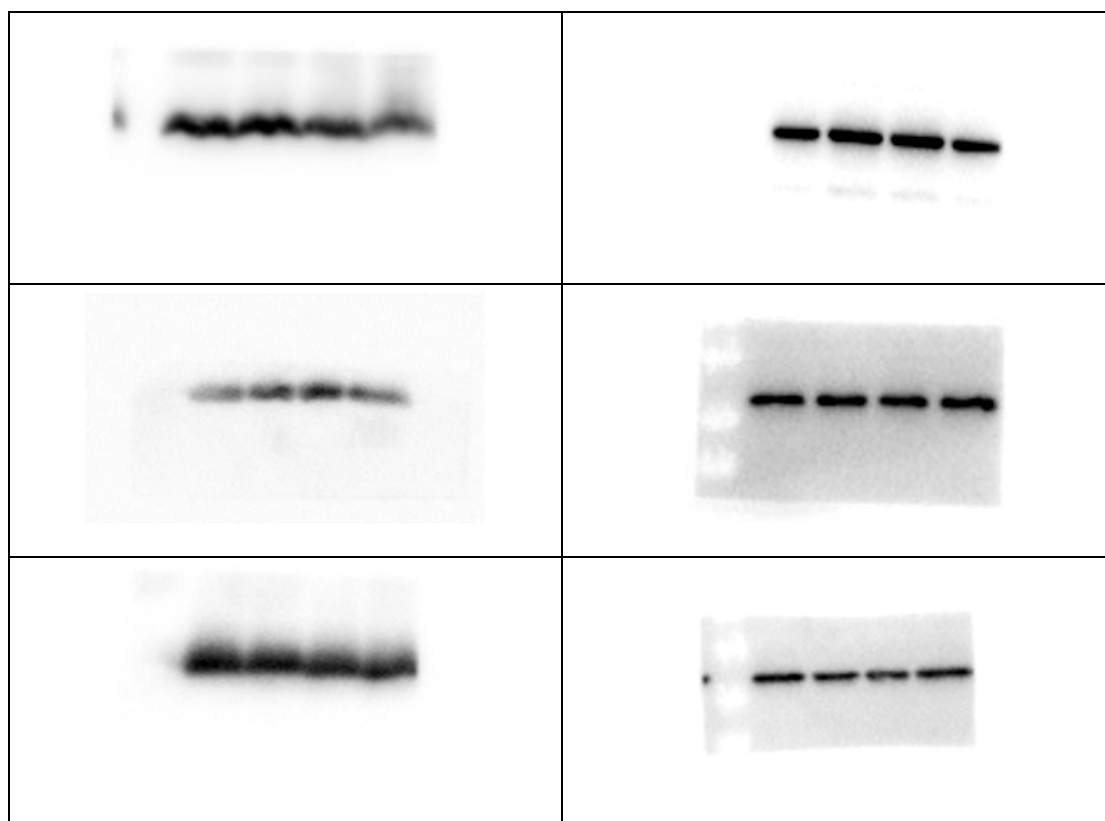

# Supplementary Figure 1

From left to right: RBLs, RBLs/FcεRIγ-Flag.

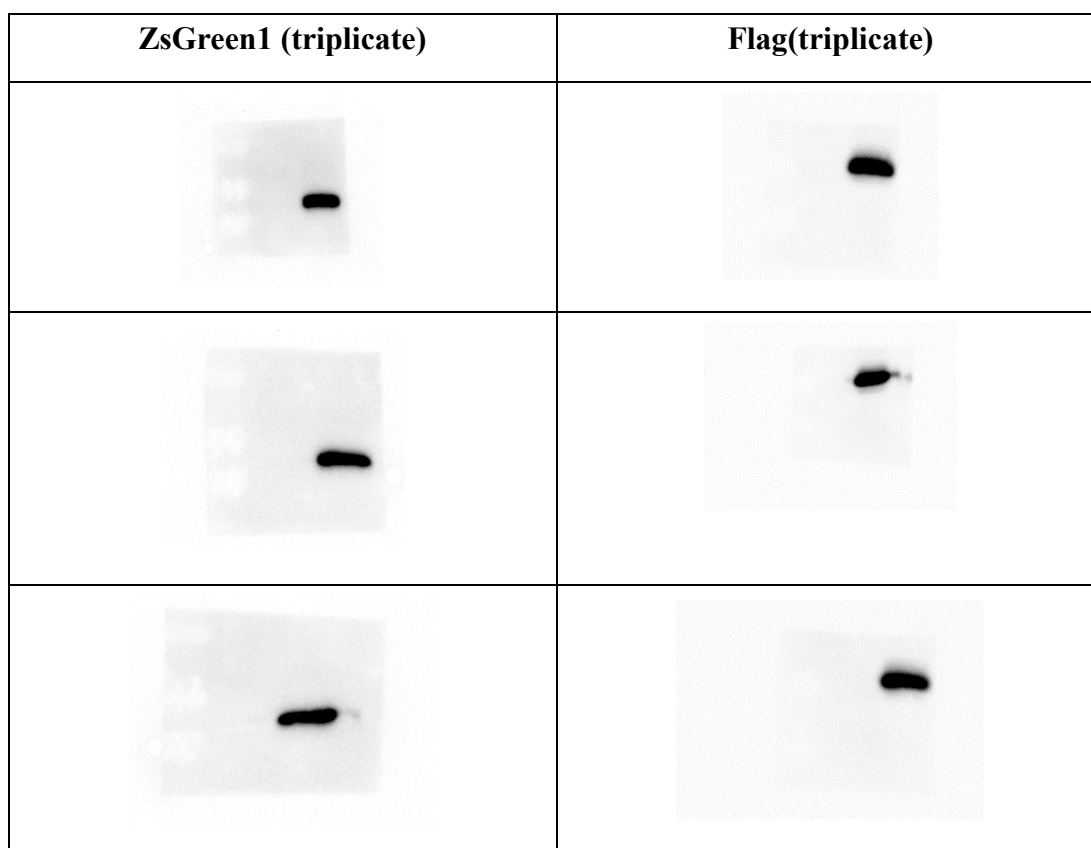

| GAPDH (triplicate)                                                                | FcεRIγ (triplicate)                                                                |
|-----------------------------------------------------------------------------------|------------------------------------------------------------------------------------|
|  |  |
|  |  |
|  |  |
