# Supplementary figures and images for: Natural isoflavone formononetin inhibits IgE-mediated mast cell activation and allergic inflammation by increasing IgE receptor degradation
Source: Royal Society of Chemistry journal article supplement (doi:10.1039/d2fo03997d), 2023-01-01

## Supplementary Figure 2

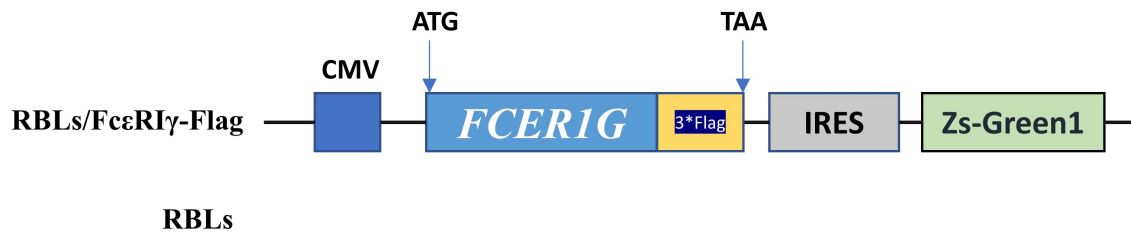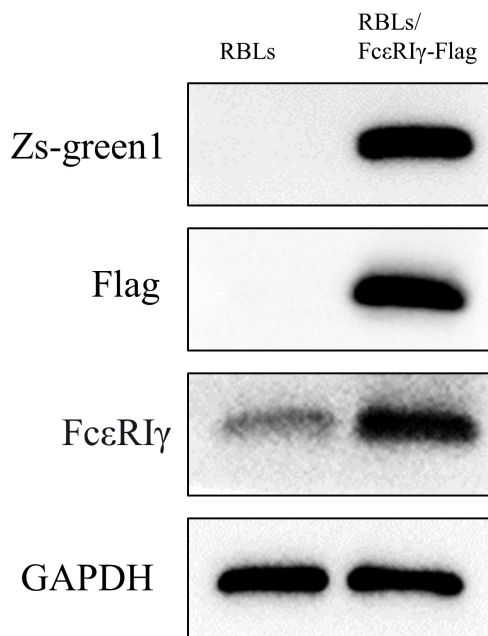

Supplement: d2fo03997d3.pdf [file d2fo03997d3.pdf]
